# Supplementary material for: Combining Genetic and Multidimensional Analyses to Identify Interpretive Traits Related to Water Shortage Tolerance as an Indirect Selection Tool for Detecting Genotypes of Drought Tolerance in Wheat Breeding
Source: MDPI journal article supplement (doi:10.3390/plants10050931), 2021-05-07
Supplement: s1 [file s1]

**Table S1.** Names and pedigree of the 25 bread wheat genotypes (7 cultivars and 18 doubled haploid lines (DHLs)) used in this study.

| Name                      | Pedigree                                                                      |
|---------------------------|-------------------------------------------------------------------------------|
| Giza-168                  | MRL/BUC//SERICM 93046-8 M-OY-OM-2Y-OB-OGZ.                                    |
| Gemmeiza-9                | Ald“s”/Huac//CMH74 .630/SxCGM 4583 -5GM- 1GM- OGM                             |
| Gemmeiza-12               | OTUS/3/SARA/THB//VEEMSS97Y00227S-5y-010M-010Y-010M-2Y-1M-0Y-OGM               |
| Sakha-93                  | Sakha 92/TR810328 S8871-IS-2S-IS-0S                                           |
| Misr1                     | OASSIS / SKAUZ//4*BCN/3/2*PATOR CMSS00Y01881T-050M-030Y-030M-030WGY-33M-0Y-0S |
| Pavone-76                 | Vcm//Cno/7C/3/Kal/Bb                                                          |
| KSU106                    | Barouk/R1474-75-3-53-3-3                                                      |
| DHLs (21,22,23,25)        | Derived from the cross (Line-115 × Gemmeiza-7) (El-Hennawy et al. 2011)       |
| DHLs (5,7,8,11)           | Derived from the cross (Line-115 × Giza-164) (El-Hennawy et al. 2011)         |
| DHLs (12,14,15,26,29, 30) | Derived from the cross (Gemmeiza-7× Giza-164) (El-Hennawy et al. 2011)        |
| DHLs (1,2,3,6)            | Derived from the cross (Giza-164× Giza-168) (El-Hennawy et al. 2011)          |

**Table S2.** Analysis of variance for 28 measured traits of 25 wheat genotypes (G) in two seasons (S) under two irrigation regimes (I).

| Source | DF |       | LWC       |           |            | RWC       |           |           | CT       |          |          |
|--------|----|-------|-----------|-----------|------------|-----------|-----------|-----------|----------|----------|----------|
|        | S  | Comb. | S1        | S2        | Comb.      | S1        | S2        | Comb.     | S1       | S2       | Comb.    |
| S      |    | 1     |           |           | 302.284**  |           |           | 68.392*   |          |          | 0.589**  |
| rep(S) | 2  | 4     | 13.836    | 0.706     | 7.271      | 25.686    | 5.626     | 15.656    | 0.095    | 0.147    | 0.121    |
| I      | 1  | 1     | 566.248** | 529.934** | 1095.882** | 1119.79** | 2776.25** | 3711.21** | 209.52** | 311.70** | 516.17** |
| S*I    |    | 1     |           |           | 0.301      |           |           | 184.836** |          |          | 5.057**  |
| rep*I  | 2  | 4     | 8.093     | 20.749    | 5.983      | 1.962     | 0.912     | 13.827    | 0.165    | 0.141    | 0.214    |
| G      | 24 | 24    | 98.288**  | 71.869**  | 82.303**   | 70.330**  | 143.972** | 124.998** | 1.422**  | 2.356**  | 2.985**  |
| S*G    |    | 24    |           |           | 87.854**   |           |           | 89.304**  |          |          | 0.793**  |
| I*G    | 24 | 24    | 27.579**  | 15.189**  | 19.435**   | 18.976**  | 40.462**  | 20.881**  | 0.787**  | 1.919**  | 1.692**  |
| S*I*G  |    | 24    |           |           | 23.334**   |           |           | 38.558**  |          |          | 1.014**  |
| Error  | 96 | 192   | 9.898     | 9.187     | 9.543      | 10.347    | 14.970    | 12.659    | 0.109    | 0.047    | 0.078    |

Table S2. Cont.

| Source | DF |       | LEWT       |           |           | Pn       |          |          | Gs       |          |          |
|--------|----|-------|------------|-----------|-----------|----------|----------|----------|----------|----------|----------|
|        | S  | Comb. | S1         | S2        | Comb.     | S1       | S2       | Comb.    | S1       | S2       | Comb.    |
| S      |    | 1     |            |           | 0.00010** |          |          | 37.002** |          |          | 0.0047** |
| rep(S) | 2  | 4     | 0.000002   | 0.00000   | 0.00000   | 0.006    | 0.191    | 0.098    | 0.0002   | 0.0000   | 0.0001   |
| I      | 1  | 1     | 0.000005** | 0.00019** | 0.00007** | 1.737    | 1.162    | 2.869*   | 0.0933** | 0.0722** | 0.1647** |
| S*I    |    | 1     |            |           | 0.00013** |          |          | 0.029    |          |          | 0.0007** |
| rep*I  | 2  | 4     | 0.000000   | 0.00000   | 0.00000   | 0.829    | 0.386    | 0.573    | 0.0000   | 0.0000   | 0.0001   |
| G      | 24 | 24    | 0.000146** | 0.00014** | 0.00026** | 11.983** | 12.605** | 24.174** | 0.0038** | 0.0039** | 0.0074** |
| S*G    |    | 24    |            |           | 0.00002** |          |          | 0.414    |          |          | 0.0003** |
| I*G    | 24 | 24    | 0.000025** | 0.00002** | 0.00003** | 2.332**  | 2.611**  | 4.500**  | 0.0024** | 0.0026** | 0.0000** |
| S*I*G  |    | 24    |            |           | 0.00002** |          |          | 0.443    |          |          | 0.0049** |
| Error  | 96 | 192   | 0.000001   | 0.00000   | 0.00000   | 0.642    | 0.611    | 0.627    | 0.0001   | 0.0001   | 0.0001   |

Table S2. Cont.

| Source | DF |       | Ci          |            |             | E        |          |          | WUE      |          |          |
|--------|----|-------|-------------|------------|-------------|----------|----------|----------|----------|----------|----------|
|        | S  | Comb. | S1          | S2         | Comb.       | S1       | S2       | Comb.    | S1       | S2       | Comb.    |
| S      |    | 1     |             |            | 16593.14**  |          |          | 2.869**  |          |          | 5.763**  |
| rep(S) | 2  | 4     | 809.603     | 2668.615** | 1739.11**   | 0.075    | 0.098    | 0.087*   | 0.055    | 0.043    | 0.049    |
| I      | 1  | 1     | 69140.700** | 56458.27** | 125277.99** | 15.785** | 14.267** | 30.033** | 21.698** | 10.041** | 30.630** |
| S*I    |    | 1     |             |            | 320.974     |          |          | 0.019    |          |          | 1.109**  |
| rep*I  | 2  | 4     | 50.168      | 72.300     | 1588.760    | 0.022    | 0.047    | 0.069    | 0.003    | 0.075    | 0.036    |
| G      | 24 | 24    | 2869.005**  | 1561.602** | 4028.503**  | 0.715**  | 0.758**  | 1.400**  | 1.468**  | 2.157**  | 2.856**  |
| S*G    |    | 24    |             |            | 402.104*    |          |          | 0.072**  |          |          | 0.769**  |
| I*G    | 24 | 24    | 1250.061**  | 1206.907** | 2244.551**  | 0.486**  | 0.401**  | 0.835**  | 0.883**  | 0.936**  | 1.163**  |
| S*I*G  |    | 24    |             |            | 212.418     |          |          | 0.052    |          |          | 0.655**  |
| Error  | 96 | 192   | 310.220     | 279.733    | 294.977     | 0.037    | 0.038    | 0.038    | 0.060    | 0.060    | 0.060    |

Table S2. Cont.

| Source | DF |       | WUEi        |            |             | Ls       |          |          | GLN     |         |         |
|--------|----|-------|-------------|------------|-------------|----------|----------|----------|---------|---------|---------|
|        | S  | Comb. | S1          | S2         | Comb.       | S1       | S2       | Comb.    | S1      | S2      | Comb.   |
| S      |    | 1     |             |            | 3923.432**  |          |          | 0.1079** |         |         | 4.844** |
| rep(S) | 2  | 4     | 3.826       | 22.182     | 13.004      | 0.0004   | 0.0012   | 0.0008   | 0.030   | 0.340** | 0.185** |
| I      | 1  | 1     | 17654.469** | 3138.862** | 17840.787** | 0.2456** | 0.2321** | 0.4776** | 1.893** | 3.426** | 5.206** |
| S*I    |    | 1     |             |            | 2952.544**  |          |          | 0.0001   |         |         | 0.113   |
| rep*I  | 2  | 4     | 2.733       | 28.366     | 16.515      | 0.0007   | 0.0001   | 0.0008   | 0.046   | 0.032   | 0.100   |
| G      | 24 | 24    | 778.105**   | 599.293**  | 1089.461**  | 0.0112** | 0.0096** | 0.0185** | 1.147** | 0.797** | 1.457** |
| S*G    |    | 24    |             |            | 287.937**   |          |          | 0.0023** |         |         | 0.487** |
| I*G    | 24 | 24    | 548.023**   | 276.521**  | 649.685**   | 0.0095** | 0.0068** | 0.0154** | 0.179** | 0.107** | 0.135** |
| S*I*G  |    | 24    |             |            | 174.860**   |          |          | 0.0009** |         |         | 0.151** |
| Error  | 96 | 192   | 16.508      | 16.877     | 16.693      | 0.000    | 0.001    | 0.000    | 0.061   | 0.016   | 0.039   |

Table S2. Cont.

| Source | DF |       | FLA       |           |           | GLA        |            |            | LAI       |          |          |
|--------|----|-------|-----------|-----------|-----------|------------|------------|------------|-----------|----------|----------|
|        | S  | Comb. | S1        | S2        | Comb.     | S1         | S2         | Comb.      | S1        | S2       | Comb.    |
| S      |    | 1     |           |           | 2.519     |            |            | 4633.313** |           |          | 11.13**  |
| rep(S) | 2  | 4     | 2.033     | 1.622     | 1.827     | 35.369*    | 134.767**  | 85.068**   | 0.021     | 0.050    | 0.035    |
| I      | 1  | 1     | 432.718** | 276.951** | 701.016** | 32649.13** | 14737.16** | 45628.40** | 229.006** | 87.967** | 300.42** |
| S*I    |    | 1     |           |           | 8.653**   |            |            | 1757.888** |           |          | 16.55**  |
| rep*I  | 2  | 4     | 2.182     | 2.673     | 3.993     | 2.103      | 56.578     | 56.419     | 0.038     | 0.127    | 0.107    |
| G      | 24 | 24    | 86.596**  | 113.911** | 190.585** | 1339.196** | 1513.739** | 2308.828** | 6.942**   | 5.084**  | 9.163**  |
| S*G    |    | 24    |           |           | 9.922**   |            |            | 544.106**  |           |          | 2.863**  |
| I*G    | 24 | 24    | 12.127**  | 9.383**   | 16.613**  | 129.302**  | 209.964**  | 205.589**  | 1.231**   | 1.756**  | 1.771**  |
| S*I*G  |    | 24    |           |           | 4.897**   |            |            | 133.676**  |           |          | 1.216**  |
| Error  | 96 | 192   | 1.174     | 1.194     | 1.184     | 11.921     | 17.157     | 14.539     | 0.041     | 0.026    | 0.034    |

Table S2. Cont.

| Source | DF |       | DSW      |          |          | DWL     |         |         | TDW      |          |          |
|--------|----|-------|----------|----------|----------|---------|---------|---------|----------|----------|----------|
|        | S  | Comb. | S1       | S2       | Comb.    | S1      | S2      | Comb.   | S1       | S2       | Comb.    |
| S      |    | 1     |          |          | 1.371*   |         |         | 0.019** |          |          | 1.718**  |
| rep(S) | 2  | 4     | 0.689    | 0.348    | 0.518    | 0.005   | 0.010   | 0.008*  | 0.583    | 0.260    | 0.421    |
| I      | 1  | 1     | 25.627** | 15.811** | 40.848** | 0.433** | 0.284** | 0.710** | 32.723** | 20.358** | 52.350** |
| S*I    |    | 1     |          |          | 0.590    |         |         | 0.008   |          |          | 0.730    |
| rep*I  | 2  | 4     | 0.139    | 0.217    | 0.648    | 0.017   | 0.010   | 0.021   | 0.229    | 0.252    | 0.612    |
| G      | 24 | 24    | 24.520** | 23.512** | 48.008** | 0.272** | 0.265** | 0.537** | 26.901** | 25.745** | 52.620** |
| S*G    |    | 24    |          |          | 0.023    |         |         | 0.000   |          |          | 0.026    |
| I*G    | 24 | 24    | 1.280**  | 1.170**  | 2.416**  | 0.037** | 0.035** | 0.071** | 1.467**  | 1.327**  | 2.753**  |
| S*I*G  |    | 24    |          |          | 0.035    |         |         | 0.001   |          |          | 0.041    |
| Error  | 96 | 192   | 0.270    | 0.325    | 0.298    | 0.003   | 0.004   | 0.004   | 0.292    | 0.349    | 0.321    |

Table S2. Cont.

| Source | DF |       | DH       |          |           | DM        |           |            | GFD       |           |           |
|--------|----|-------|----------|----------|-----------|-----------|-----------|------------|-----------|-----------|-----------|
|        | S  | Comb. | S1       | S2       | Comb.     | S1        | S2        | Comb.      | S1        | S2        | Comb.     |
| S      |    | 1     |          |          | 8.670**   |           |           | 6.750**    |           |           | 5.880*    |
| rep(S) | 2  | 4     | 0.427    | 0.027    | 0.227     | 2.407     | 4.207     | 3.307*     | 1.207     | 0.407     | 0.807     |
| I      | 1  | 1     | 74.907** | 70.727** | 145.603** | 695.527** | 657.307** | 1352.563** | 328.560** | 294.000** | 622.080** |
| S*I    |    | 1     |          |          | 0.030     |           |           | 0.270      |           |           | 0.480     |
| rep*I  | 2  | 4     | 5.787    | 6.907    | 6.293     | 3.207     | 3.847     | 6.553      | 0.380     | 1.620     | 1.527     |
| G      | 24 | 24    | 81.087** | 83.868** | 164.834** | 75.649**  | 75.154**  | 150.727**  | 19.709**  | 18.490**  | 38.056**  |
| S*G    |    | 24    |          |          | 0.121     |           |           | 0.076      |           |           | 0.144     |
| I*G    | 24 | 24    | 1.448    | 1.352**  | 2.721**   | 3.138**   | 2.557**   | 5.501**    | 3.129*    | 3.056**   | 5.844**   |
| S*I*G  |    | 24    |          |          | 0.079     |           |           | 0.194      |           |           | 0.341     |
| Error  | 96 | 192   | 1.030    | 0.821    | 0.926     | 1.432     | 1.249     | 1.341      | 1.800     | 1.583     | 1.692     |

Table S2. Cont.

| Source | DF |       | NSP         |             |             | PH        |          |           | SL      |         |          |
|--------|----|-------|-------------|-------------|-------------|-----------|----------|-----------|---------|---------|----------|
|        | S  | Comb. | S1          | S2          | Comb.       | S1        | S2       | Comb.     | S1      | S2      | Comb.    |
| S      |    | 1     |             |             | 590875.32** |           |          | 21.870    |         |         | 137.78** |
| rep(S) | 2  | 4     | 545.807     | 278.167     | 411.987     | 12.713    | 22.622   | 17.667    | 0.159   | 0.093   | 0.126    |
| I      | 1  | 1     | 729550.14** | 262504.17** | 933645.65** | 2277.60** | 401.80** | 2296.33** | 17.54** | 10.62** | 27.731** |
| S*I    |    | 1     |             |             | 58408.65**  |           |          | 383.070** |         |         | 0.431    |
| rep*I  | 2  | 4     | 889.940     | 2202.167    | 1698.70     | 23.533    | 68.682   | 25.438    | 0.701   | 0.653   | 0.375    |
| G      | 24 | 24    | 54457.79**  | 17506.44**  | 53328.17**  | 278.954** | 245.01** | 440.145** | 6.954** | 7.246** | 7.170**  |
| S*G    |    | 24    |             |             | 18636.06**  |           |          | 83.814**  |         |         | 7.029**  |
| I*G    | 24 | 24    | 14722.50**  | 6366.56**   | 10219.66**  | 36.544**  | 17.607** | 33.791**  | 0.489** | 0.765** | 0.861**  |
| S*I*G  |    | 24    |             |             | 10869.40**  |           |          | 20.360**  |         |         | 0.394**  |
| Error  | 96 | 192   | 833.846     | 527.000     | 680.423     | 12.323    | 9.079    | 10.701    | 0.167   | 0.225   | 0.196    |

Table S2. Cont.

| Source | DF |       | NSS      |          |           | NG         |           |           |
|--------|----|-------|----------|----------|-----------|------------|-----------|-----------|
|        | S  | Comb. | S1       | S2       | Comb.     | S1         | S2        | Comb.     |
| S      |    | 1     |          |          | 173.949** |            |           | 367.369** |
| rep(S) | 2  | 4     | 1.618**  | 1.074    | 1.346**   | 2.465      | 7.047     | 4.756     |
| I      | 1  | 1     | 21.904** | 44.303** | 64.255**  | 2881.603** | 6.320     | 1578.91** |
| S*I    |    | 1     |          |          | 1.952*    |            |           | 1309.01** |
| rep*I  | 2  | 4     | 3.361    | 1.672    | 1.066     | 13.672     | 16.290    | 4.504     |
| G      | 24 | 24    | 10.705** | 20.916** | 18.001**  | 108.797**  | 163.744** | 227.460** |
| S*G    |    | 24    |          |          | 13.620**  |            |           | 45.081**  |
| I*G    | 24 | 24    | 0.639**  | 1.307**  | 0.597     | 65.001**   | 14.545**  | 38.455**  |
| S*I*G  |    | 24    |          |          | 1.348**   |            |           | 41.090**  |
| Error  | 96 | 192   | 0.322    | 0.436    | 0.379     | 4.614      | 4.203     | 4.409     |

Table S2. Cont.

| Source | DF |       | HW         |           |           | GY       |          |          |
|--------|----|-------|------------|-----------|-----------|----------|----------|----------|
|        | S  | Comb. | S1         | S2        | Comb.     | S1       | S2       | Comb.    |
| S      |    | 1     |            |           | 2363.38** |          |          | 3.272**  |
| rep(S) | 2  | 4     | 5.796      | 4.620     | 5.208     | 0.070    | 0.191    | 0.130    |
| I      | 1  | 1     | 1816.212** | 246.375** | 1700.23** | 50.425** | 42.347** | 92.596** |
| S*I    |    | 1     |            |           | 362.362** |          |          | 0.536**  |
| rep*I  | 2  | 4     | 3.909      | 0.294     | 1.594     | 0.035    | 0.011    | 0.057    |
| G      | 24 | 24    | 212.467**  | 155.558** | 314.603** | 6.903**  | 5.775**  | 11.965** |
| S*G    |    | 24    |            |           | 53.422**  |          |          | 0.713**  |
| I*G    | 24 | 24    | 28.195**   | 21.414**  | 29.064**  | 0.839**  | 1.177**  | 1.714**  |
| S*I*G  |    | 24    |            |           | 20.545**  |          |          | 0.302**  |
| Error  | 96 | 192   | 5.508      | 3.285     | 4.390     | 0.066    | 0.095    | 0.080    |

**Table S3.** Principal component analysis of 25 wheat genotypes, eigenvalues, proportion, and cumulative variance for the first seven components for 27 measured traits of 100 treatments.

| Value              | PC1         | PC2         | PC3         | PC4         | PC5         | PC6   | PC7         |
|--------------------|-------------|-------------|-------------|-------------|-------------|-------|-------------|
| Eigenvalue         | 10.04       | 3.10        | 2.93        | 2.21        | 1.49        | 1.32  | 0.94        |
| Variability (%)    | 37.18       | 11.48       | 10.84       | 8.17        | 5.53        | 4.89  | 3.49        |
| Cumulative %       | 37.18       | 48.66       | 59.50       | 67.67       | 73.20       | 78.09 | 81.58       |
| Component loading* |             |             |             |             |             |       |             |
| DH                 | 0.07        | 0.22        | <b>0.39</b> | 0.08        | 0.01        | 0.05  | 0.00        |
| GFD                | <b>0.37</b> | 0.16        | 0.01        | 0.02        | 0.06        | 0.17  | 0.02        |
| DSW                | 0.26        | 0.10        | <b>0.55</b> | 0.01        | 0.00        | 0.00  | 0.02        |
| DLW                | 0.29        | <b>0.40</b> | 0.00        | 0.10        | 0.01        | 0.03  | 0.03        |
| TDW                | 0.29        | 0.14        | <b>0.47</b> | 0.02        | 0.00        | 0.00  | 0.03        |
| NSP                | <b>0.33</b> | 0.01        | 0.11        | 0.02        | 0.20        | 0.10  | 0.04        |
| PH                 | <b>0.39</b> | 0.18        | 0.00        | 0.07        | 0.05        | 0.00  | 0.02        |
| GLN                | 0.24        | 0.24        | <b>0.26</b> | 0.02        | 0.01        | 0.01  | 0.00        |
| FLA                | <b>0.44</b> | 0.01        | 0.24        | 0.03        | 0.05        | 0.05  | 0.00        |
| GLA                | <b>0.62</b> | 0.02        | 0.00        | 0.21        | 0.02        | 0.04  | 0.00        |
| LAI                | <b>0.70</b> | 0.03        | 0.03        | 0.03        | 0.02        | 0.09  | 0.01        |
| SL                 | 0.21        | 0.14        | 0.00        | <b>0.35</b> | 0.00        | 0.00  | 0.00        |
| NSS                | <b>0.25</b> | 0.20        | 0.05        | 0.18        | 0.02        | 0.04  | 0.06        |
| LWC                | 0.23        | 0.18        | 0.05        | 0.03        | 0.06        | 0.00  | 0.08        |
| RWC                | <b>0.57</b> | 0.01        | 0.00        | 0.00        | 0.00        | 0.00  | 0.08        |
| NG                 | 0.14        | 0.08        | 0.17        | 0.04        | 0.06        | 0.01  | 0.02        |
| HW                 | 0.24        | 0.00        | <b>0.27</b> | 0.22        | 0.06        | 0.02  | 0.02        |
| CT                 | <b>0.70</b> | 0.02        | 0.01        | 0.01        | 0.00        | 0.04  | 0.00        |
| LEWT               | 0.00        | 0.08        | 0.05        | 0.28        | 0.04        | 0.00  | <b>0.33</b> |
| Pn                 | 0.05        | 0.12        | 0.03        | 0.12        | <b>0.52</b> | 0.00  | 0.10        |
| Gs                 | <b>0.70</b> | 0.05        | 0.00        | 0.02        | 0.09        | 0.05  | 0.02        |
| Ci                 | <b>0.66</b> | 0.06        | 0.00        | 0.05        | 0.07        | 0.00  | 0.01        |
| E                  | <b>0.67</b> | 0.03        | 0.00        | 0.04        | 0.04        | 0.06  | 0.04        |
| WUE                | <b>0.32</b> | 0.24        | 0.00        | 0.06        | 0.04        | 0.19  | 0.00        |
| WUEi               | <b>0.44</b> | 0.23        | 0.00        | 0.08        | 0.00        | 0.12  | 0.00        |
| Ls                 | <b>0.61</b> | 0.08        | 0.02        | 0.08        | 0.04        | 0.05  | 0.00        |
| GY                 | <b>0.23</b> | 0.09        | 0.21        | 0.02        | 0.00        | 0.19  | 0.00        |

\* values  $\geq 0.30$  are presented in bold face and indicates traits important for PC definition; days to heading number (DH),

|                    |    |        |        |        |
|--------------------|----|--------|--------|--------|
| parameters         |    | Can1   | Can2   | Can3   |
| Eigenvalue         |    | 21.299 | 3.552  | 1.656  |
| Discrimination (%) |    | 79.366 | 13.235 | 6.172  |
| Cumulative %       |    | 79.366 | 92.601 | 98.773 |
|                    |    |        |        |        |
| Variable           |    |        |        |        |
| GLA                | S1 | 0.83   | 0.33   | -0.31  |
|                    | S2 | 0.73   | 0.11   | -0.46  |
| LAI                | S1 | 0.86   | -0.04  | -0.47  |
|                    | S2 | 0.74   | -0.29  | -0.26  |
| RWC                | S1 | 0.79   | 0.24   | 0.40   |
|                    | S2 | 0.70   | 0.11   | 0.45   |
| CT                 | S1 | 0.72   | -0.63  | 0.09   |
|                    | S2 | 0.73   | -0.61  | 0.02   |
| Drought Group      |    |        |        |        |
| HS                 |    | -3.49  | -2.03  | 1.12   |
| HT                 |    | 6.67   | -0.35  | -0.06  |
| I                  |    | -5.04  | -0.87  | -3.40  |
| S                  |    | -3.41  | 3.71   | 0.80   |
| T                  |    | 0.15   | 0.61   | -0.25  |

Table S5. Summary (LS means) of all pairwise comparisons for Class (Duncan)

[illegible]
